# Supplementary material for: Narciclasine attenuates diet-induced obesity by promoting oxidative metabolism in skeletal muscle
Source: PLoS Biol. 2017 Feb 16;15(2):e1002597. doi: 10.1371/journal.pbio.1002597 (PMC5331945; doi:10.1371/journal.pbio.1002597)
Supplement: S1 Data — (XLSX) [file pbio.1002597.s017.xlsx]

## Sheet: Fig1A
Body Weight (g)
Weeks	NCD-veh												mean	SEM	NCD-ncls												mean	SEM	HFD-veh														mean	SEM	HFD-ncls
0	26.21	27.24	27.43	26.68	26.4	27.6	26.22	26.98	29.08	28.13	28.42	27.12	27.2925	0.259738	26.24	26.2	25.89	26.68	24.73	26.83	28.39	25.93	26.15	25.78	25.98	26.22	26.2517	0.245421	27.86	26.3	25.85	27.93	27.25	27.38	27.31	25.95	26.68	27.02	27.004	27.26	26.59	27.77	27.011	0.17778	27.62	27.39	28.15	27.64	27.06
1	27.19	26.73	27.55	28.87	26.79	27.44	26.87	29.83	28.33	30.13	28.91	29.83	28.2058	0.368723	29.31	28.51	29.67	28.71	28.94	25.44	30.04	30.27	29.28	28.27	28.25	29.97	28.8883	0.371381	31.19	30.25	29.87	31.83	31.06	31.71	30.19	28.78	29.93	29.11	31.97	30.77	29.88	31.05	30.5421	0.264049	31.1	32.33	31.97	29.93	30.78
2	25.5	26.42	26.03	25.92	27.88	27.48	30.11	30.2	30.48	28.15	27.63	28.11	27.8258	0.49611	26.5	25.98	25.01	27.17	25.7	29.03	30.26	31.43	26.91	29.75	28.65	26.94	27.7775	0.579873	32.01	28.86	27.12	33.6	32.14	32.95	30.89	30.62	33.15	31.29	33.37	31.65	29.16	32.02	31.345	0.503713	30.88	27.6	29.3	30.21	29.26
3	30.74	29.86	30.97	28.51	29.16	27.92	31.15	31.48	29.37	30.55	30.19	29.38	29.94	0.318017	29.44	30.84	28.14	29.85	25.51	30.94	30.66	31.53	30.25	28.97	29.21	30.56	29.6583	0.468571	34.2	35.24	32.68	36.21	34.31	35.32	32.5	32.53	32.64	35.05	34.29	35.41	33.77	32.56	34.0507	0.344249	34.62	32.39	33.15	33.94	31.31
4	27.23	28.37	28	27.74	29.47	28.08	31.59	31.61	32.23	30.4	31.34	29.7	29.6467	0.507857	27.48	27.74	29.83	26.99	26.18	31.19	31.06	31.36	31.64	30.12	27.34	27.52	29.0375	0.579588	37.31	32.63	29.99	38.17	36.87	38.06	34.61	35.19	33.66	36.58	35.6	34.47	35.25	35.99	35.3129	0.591867	35.11	29.91	31.82	32.89	31.69
5	28.26	29.24	28.73	29.31	29.96	28.59	32.66	32.41	31.05	33.47	30.39	31.15	30.435	0.499355	28.05	27.85	28.48	31.29	26.63	31.62	31.56	31.93	30.92	28.53	29.48	28.89	29.6025	0.516053	42.13	36.2	32.54	39.18	38.01	39.31	35.82	35.63	33.82	37.12	35.46	35.05	37.41	38.27	36.8536	0.658871	36.63	32.16	33.71	36.07	33.05
6	28.01	31.58	29.27	27.74	30.38	28.28	31.58	32.49	31.45	28.57	29.36	28.47	29.765	0.477775	28.76	28.8	29.76	33.74	26.99	32.11	31.04	30.56	29.88	30.32	31.05	29.74	30.2292	0.496861	36.04	38.27	35.78	40.37	39.03	41.17	35.7	36.25	33.73	37.81	35.2	39.04	38.07	36.68	37.3672	0.560871	37.43	31.37	31.4	37.44	32.33
7	29.15	29.75	28.98	31.38	30.42	29.18	33.12	32.41	31.64	33.97	31.18	32.99	31.1808	0.493685	28.87	28.19	28.79	31.76	28.01	33.11	32.24	32.93	30.72	29.66	31.03	32.59	30.6583	0.547388	46.3	38.25	34.19	41.9	40.4	41.24	38.36	37.71	34.93	39.5	38.13	40.45	38.21	39.49	39.2186	0.792546	37.65	33.15	34.05	37.26	34.3
8	29.87	30.83	33.59	30.79	31.24	30.69	31.71	33.17	30.22	32.24	32.37	33.69	31.7008	0.377288	30.17	30.36	31.83	30.86	27.29	31.89	31.97	31.76	30.34	30.36	29.77	31.12	30.6433	0.376665	37.3	38.78	39.47	40.89	39.73	41.51	35.46	36.46	40.47	39.57	36.7	37.55	39.71	38.52	38.7229	0.480871	36.36	36.24	35.92	35.24	34.31
9	32.59	33.48	32.95	33.53	31.54	31.37	35.75	33.76	31.25	33.97	32.66	32.72	32.9642	0.36714	32.85	34.19	30.25	32.87	28.26	34.33	33.4	34.14	32.36	31.59	32.04	33.17	32.4542	0.511142	40.36	42.24	41.2	43.92	43.21	44.78	38.29	39.04	42.82	43.9	39.73	43.47	41.94	40.31	41.8007	0.538066	37.64	40.06	39.58	41.21	38.62
Parameter
Table Analyzed	*Body weight
Two-way ANOVA
Source of Variation	% of total variation	P value
HFD-ncls vs HFD-veh	2.88	< 0.0001
Source of Variation	P value summary	Significant?
HFD-ncls vs HFD-veh	****	Yes
Table Analyzed	*Body weight
Two-way ANOVA
Source of Variation	% of total variation	P value
NCD-veh vs NCDncls	0.61	0.2719
Source of Variation	P value summary	Significant?
NCD-veh vs NCDncls	ns	No
[truncated: 11 more columns]

## Sheet: Fig1B
Lean Mass (g)
Weeks	NCD-veh												mean	SEM	NCD-ncls												mean	SEM	HFD-veh														mean	SEM	HFD-ncls
0	24	25.02	25.31	24.26	23.46	25.2	23.9	24.86	26.92	25.72	25.73	24.51	24.9075	0.27744	23.31	23.09	23.36	23.86	22.22	23.54	25.87	23.05	23.43	22.89	23.24	23.56	23.4517	0.249742	25.75	24.09	23.54	25.57	25.15	25.31	25.21	23.62	24.71	24.8	24.77	25.18	24.47	25.56	24.8379	0.186789	25.4	24.93	25.68	25.33	24.52
1	25.16	24.37	25.08	26.22	24.11	24.13	24.22	27.39	25.92	27.79	26.06	27.02	25.6225	0.379106	26.46	25.63	27.35	26.06	26.46	22.68	27.51	27.53	26.7	25.6	25.62	27.53	26.2608	0.392626	26.05	25.08	24.63	26.53	24.28	26.24	26.25	23.47	25.9	25.05	26.27	25.88	25.05	25.88	25.4686	0.239608	25.59	26.81	26.43	24.5	25.25
2	23.81	23.83	23.55	22.97	24.35	24.98	27.46	27.48	28.13	25.53	24.88	25.46	25.2025	0.488078	23.57	22.75	22.05	23.84	22.68	25.25	27.59	28.55	23.93	26.74	25.37	23.96	24.69	0.59128	24.84	22.5	21.29	27.24	23.9	26.75	26.65	23.94	28.29	26.1	26.08	25.42	23.05	25.7	25.125	0.527416	24.03	23.29	24.24	25.13	24.15
3	28.65	27.07	28.57	25.51	25.96	25.46	28.62	28.41	26.77	27.87	28.02	26.49	27.2833	0.354891	26.38	28.01	25.05	26.88	22.63	27.68	28.05	28.9	27.61	26.23	26.3	28.04	26.8133	0.489369	26.27	27.91	25.69	28.57	24.25	27.74	27.29	24.56	27.75	26.99	27.59	28.36	26.65	25.4	26.7871	0.366887	26.99	27.2	26.91	27.82	25.26
4	24.15	25.07	25	25.38	27.59	25.08	28.93	28.89	28.49	26.97	28.56	26.65	26.73	0.505317	24.69	25.5	25.81	23.32	22.69	27.73	28.18	28.62	28.7	26.96	23.88	24.44	25.8767	0.613654	24.97	22.93	22.33	28.59	24.64	28.12	27.34	25.52	28.18	27.88	27.29	25.19	26.1	26.91	26.1421	0.525164	25.4	23.89	25.87	25.91	24.98
5	24.75	25.51	25.9	26.46	27.96	25.26	28.92	29.55	27.08	28.96	27.14	27.73	27.1017	0.453929	25.66	23.83	25.44	26.72	23.06	27.65	28.87	29.22	27.57	25.25	25.92	25.6	26.2325	0.537763	26.43	24.22	22.84	28.35	24.42	28.52	27.42	25.39	28.62	27.8	28.05	24.6	27.25	27.99	26.5643	0.510485	26.72	24.56	26.87	26.91	25.54
6	24.84	28.65	26.5	25.33	27.77	24.78	27	29.32	27.51	25.39	25.87	25.12	26.5067	0.444441	25.77	24.78	27	29.32	23.2	27.21	28.02	27.87	26.3	26.76	27.37	26.27	26.6558	0.459752	24.08	27.3	24.96	29.31	24.72	28.66	26.03	25.54	28.23	27.24	26.75	28.11	27.66	26.25	26.7743	0.421213	27.74	23.95	25.64	27.18	24.85
7	25.25	26.14	25.86	28.86	27.97	25.59	29	29.04	26.95	29.14	27.75	29.17	27.56	0.441607	26.31	23.98	25.74	26.72	23.46	28.05	29.34	29.65	26.75	25.9	27.11	28.91	26.8267	0.563854	28.86	24.41	23.05	29.05	25.01	29.62	25.21	26.37	26.54	27.12	26.51	30.88	25.7	27.22	26.825	0.580017	26.51	24.18	26.54	26.3	25.58
8	26.01	26.97	29.62	26.9	28.13	27.15	26.78	28.78	26.39	28.82	28.55	29.75	27.8208	0.368616	27.33	25.91	28.66	26	22.99	27.25	28.72	28.63	26.48	26.53	26.03	27.23	26.8133	0.459557	21.99	27.06	29.51	30.86	24.21	28.99	24.6	24.16	34.62	29.38	25.83	27.75	29.42	28.27	27.6179	0.875987	24.16	26.66	27.87	23.91	25.03
9	28.01	28.71	28.17	29.26	28.31	26.5	28.96	29.88	27.3	29.69	28.41	28.37	28.4642	0.275083	29.44	29.25	26.28	27.49	23.54	28.67	30.05	30.32	27.97	27.34	27.65	28.8	28.0667	0.536018	24.09	27.9	29.84	30.95	29.51	26.93	23.1	28.79	29.95	30.02	25.01	32.1	28.68	26.45	28.0943	0.710281	24.48	29.28	30.55	29.12	28.45
[truncated: 11 more columns]

## Sheet: Fig1C
Fat Mass (g)
Weeks	NCD-veh												mean	SEM	NCD-ncls												mean	SEM	HFD-veh														mean	SEM	HFD-ncls
0	2.21	2.22	2.12	2.42	2.94	2.4	2.32	2.12	2.16	2.41	2.69	2.61	2.385	0.0731799	2.93	3.11	2.53	2.82	2.51	3.29	2.52	2.88	2.72	2.89	2.74	2.66	2.8	0.0692492	2.11	2.21	2.31	2.36	2.1	2.07	2.1	2.33	1.97	2.22	2.234	2.08	2.12	2.21	2.17314	0.0301058	2.22	2.46	2.47	2.31	2.54
1	2.03	2.36	2.47	2.65	2.68	3.31	2.65	2.44	2.41	2.34	2.85	2.81	2.58333	0.0932359	2.85	2.88	2.32	2.65	2.48	2.76	2.53	2.74	2.58	2.67	2.63	2.44	2.6275	0.0483849	5.14	5.17	5.24	5.3	6.78	5.47	3.94	5.31	4.03	4.06	5.7	4.89	4.83	5.17	5.07357	0.197703	5.51	5.52	5.54	5.43	5.53
2	1.69	2.59	2.48	2.95	3.53	2.5	2.65	2.72	2.35	2.62	2.75	2.65	2.62333	0.121177	2.93	3.23	2.96	3.33	3.02	3.78	2.67	2.88	2.98	3.01	3.28	2.98	3.0875	0.0820119	7.17	6.36	5.83	6.36	8.24	6.2	4.24	6.68	4.86	5.19	7.29	6.23	6.11	6.32	6.22	0.271182	6.85	4.31	5.06	5.08	5.11
3	2.09	2.79	2.4	3	3.2	2.46	2.53	3.07	2.6	2.68	2.17	2.89	2.65667	0.100697	3.06	2.83	3.09	2.97	2.88	3.26	2.61	2.63	2.64	2.74	2.91	2.52	2.845	0.0651281	7.93	7.33	6.99	7.64	10.06	7.58	5.21	7.97	4.89	8.06	6.7	7.05	7.12	7.16	7.26357	0.331199	7.63	5.19	6.24	6.12	6.05
4	3.08	3.3	3	2.36	1.88	3	2.66	2.72	3.74	3.43	2.78	3.05	2.91667	0.141808	2.79	2.24	4.02	3.67	3.49	3.46	2.88	2.74	2.94	3.16	3.46	3.08	3.16083	0.139846	12.34	9.7	7.66	9.58	12.23	9.94	7.27	9.67	5.48	8.7	8.31	9.28	9.15	9.08	9.17071	0.475739	9.71	6.02	5.95	6.98	6.71
5	3.51	3.73	2.83	2.85	2	3.33	3.74	2.86	3.97	4.51	3.25	3.42	3.33333	0.18763	2.39	4.02	3.04	4.57	3.57	3.97	2.69	2.71	3.35	3.28	3.56	3.29	3.37	0.180084	15.7	11.98	9.7	10.83	13.59	10.79	8.4	10.24	5.2	9.32	7.41	10.45	10.16	10.28	10.2893	0.673944	9.91	7.6	6.84	9.16	7.51
6	3.17	2.93	2.77	2.41	2.61	3.5	4.58	3.17	3.94	3.18	3.49	3.35	3.25833	0.17056	2.99	4.02	2.76	4.42	3.79	4.9	3.02	2.69	3.58	3.56	3.68	3.47	3.57333	0.191364	11.96	10.97	10.82	11.06	14.31	12.51	9.67	10.71	5.5	10.57	8.45	10.93	10.41	10.43	10.5929	0.531131	9.69	7.42	5.76	10.26	7.48
7	3.9	3.61	3.12	2.52	2.45	3.59	4.12	3.37	4.69	4.83	3.43	3.82	3.62083	0.211522	2.56	4.21	3.05	5.04	4.55	5.06	2.9	3.28	3.97	3.76	3.92	3.68	3.83167	0.231654	17.44	13.84	11.14	12.85	15.39	11.62	13.15	11.34	8.39	12.38	11.62	9.57	12.51	12.27	12.3936	0.598653	11.14	8.97	7.51	10.96	8.72
8	3.86	3.86	3.97	3.89	3.11	3.54	4.93	4.39	3.83	3.42	3.82	3.94	3.88	0.132041	2.84	4.45	3.17	4.86	4.3	4.64	3.25	3.13	3.86	3.83	3.74	3.89	3.83	0.18621	15.31	11.72	9.96	10.03	15.52	12.52	10.86	12.3	5.85	10.19	10.87	9.8	10.29	10.25	11.105	0.642433	12.2	9.58	8.05	11.33	9.28
9	4.58	4.77	4.78	4.27	3.23	4.87	6.79	3.88	3.95	4.28	4.25	4.35	4.5	0.246564	3.41	4.94	3.97	5.38	4.72	5.66	3.35	3.82	4.39	4.25	4.39	4.37	4.3875	0.205375	16.27	14.34	11.36	12.97	13.7	17.85	15.19	10.25	12.87	13.88	14.72	11.37	13.26	13.86	13.7064	0.533377	13.16	10.78	9.03	12.09	10.17
Parameter
Table Analyzed	*Fat Mass
Two-way ANOVA
Source of Variation	P value
HFD-ncls vs HFD-veh	< 0.0001
Source of Variation	P value summary	Significant?
HFD-ncls vs HFD-veh	****	Yes
[truncated: 11 more columns]

## Sheet: Fig1E
Fat tissue volume
	Visceral fat					Subcutaneous fat
Mouse #	NCD vehicle	NCD narciclasine	HFD vehicle	HFD narciclasine		NCD vehicle	NCD narciclasine	HFD vehicle	HFD narciclasine
1	4398.42	4852.57	8481.93	8063.26		917.06	729.65	2983.08	2997.96
2	6223.63	4398.42	8933.98	6621.03		1073.37	949.666	3695.26	2186.78
3	4852.57	4149.62	6708.6	6330.44		674.471	1103.59	2527.66	2231.31
4			8933.98	4151.58				2998.66	1769.68
5			8348.81	4173.74				2608.54	2258.34
6			6275.12	5695.98				1803.98	2362.97
7			8481.93	4879.85				2609.15	2379.41
Mean	5158.21	4466.87	8023.48	5702.27		888.301	927.634	2746.62	2312.35
SEM	548.6	251.7	407.4	557.1		116	132.8	217.9	186.2
Visceral fat
Comparison		P value	P value summary
NCD-veh vs HFD-veh		0.0042	**
HFD-veh vs HFD-ncls		0.0177001	*
Subcutaneous fat
Comparison		P value	P value summary
NCD-veh vs HFD-veh		0.0007	***

## Sheet: Fig1H
	Frequency distribution
	Adipocyte area (µm2)	NCD-veh	NCD-ncls	HFD-veh	HFD-ncls
	0	5.44218	29.8638	0	9.52381
	1000	84.3537	61.7957	0	24.7619
	2000	10.2041	7.81135	7.68422	22.8571
	3000	0	0.512587	6.38298	17.1429
	4000	0	0.016497	14.8936	20.9524
	5000	0	0	21.2766	3.80952
	6000	0	0	27.6596	0
	7000	0	0	17.0213	0.952381
	8000	0	0	2.12766	0
	9000	0	0	2.96273	0
	10000	0	0	0	0

## Sheet: Fig2B
TG CONTENT LIVER						TG CONTENT BAT						TG CONTENT MUSCLE
	A	B	C	D			A	B	C	D			A	B	C	D
	NCD-veh	NCD-ncls	HFD-veh	HFD-ncls			NCD-veh	NCD-ncls	HFD-veh	HFD-ncls			NCD-veh	NCD-ncls	HFD-veh	HFD-ncls
	1.07296	0.98764	2.05329	1.57098			3.71169	2.87463	7.44274	5.89472			0.319	0.22268	4.24357	0.615282
	1.13345	0.76543	1.99817	1.52963			3.69411	1.10733	9.70791	4.98735			0.200143	0.25161	5.37338	0.904042
	0.984638	1.26378	3.00415	1.52963			1.19445	2.36952	6.89737	6.01536			0.29321	0.26205	4.22398	0.60839
	1.03564	0.97526	2.74232	1.70878			0.616054	2.52766	6.89737	3.69411			0.313414	0.38662	5.32534	0.875214
	1.42256	1.02374	2.71476	1.72256			0.353145	1.76968	5.61303	4.22398			0.292013	0.25493	2.61642	0.829988
	1.32847	1.00284	2.70098	1.80524									0.307901	0.20306	2.53738
													0.350714
	NCD-veh	NCD-ncls	HFD-veh	HFD-ncs			NCD	NCD-ncls	HFD-veh	HFD-ncs			NCD	NCD-ncls	HFD-veh	HFD-ncs
Number of values	6	6	6	6		Number of values	5	5	5	5		Number of values	7	6	6	5
Minimum	0.9846	0.7654	1.998	1.53		Minimum	0.3531	1.107	5.613	3.694		Minimum	0.2001	0.2031	2.537	0.6084
25% Percentile	1.023	0.9228	2.04	1.53		25% Percentile	0.4846	1.439	6.255	3.959		25% Percentile	0.292	0.2178	2.597	0.6118
Median	1.103	0.9952	2.708	1.64		Median	1.194	2.37	6.897	4.987		Median	0.3079	0.2533	4.234	0.83
75% Percentile	1.352	1.084	2.808	1.743		75% Percentile	3.703	2.701	8.575	5.955		75% Percentile	0.319	0.2932	5.337	0.8896
Maximum	1.423	1.264	3.004	1.805		Maximum	3.712	2.875	9.708	6.015		Maximum	0.3507	0.3866	5.373	0.904
Mean	1.163	1.003	2.536	1.644		Mean	1.914	2.13	7.312	4.963		Mean	0.2966	0.2635	4.053	0.7666
Std. Deviation	0.1742	0.1587	0.4106	0.1165		Std. Deviation	1.661	0.6974	1.499	1.016		Std. Deviation	0.04686	0.06433	1.248	0.1437
Std. Error	0.07113	0.06478	0.1676	0.04756		Std. Error	0.7429	0.3119	0.6704	0.4546		Std. Error	0.01771	0.02626	0.5095	0.06428
Lower 95% CI of mean	0.9801	0.8366	2.105	1.522		Lower 95% CI of mean	-0.1488	1.264	5.45	3.701		Lower 95% CI of mean	0.2533	0.196	2.744	0.5881
Upper 95% CI of mean	1.346	1.17	2.967	1.767		Upper 95% CI of mean	3.977	2.996	9.173	6.225		Upper 95% CI of mean	0.34	0.331	5.363	0.945
Sum	6.978	6.019	15.21	9.867		Sum	9.569	10.65	36.56	24.82		Sum	2.076	1.581	24.32	3.833
Table Analyzed	*Hepatic TG levels					Table Analyzed	BAT TG levels					Table Analyzed	muscle TG levels
Column A	NCD-veh					Column A	NCD-veh					Column A	NCD-veh
vs	vs					vs	vs					vs	vs
Column B	NCD-ncls					Column B	NCD-ncls					Column B	NCD-ncls
Unpaired t test						Unpaired t test						Unpaired t test
P value	0.1276					P value	0.7955					P value	0.3061
P value summary	ns					P value summary	ns					P value summary	ns
Are means signif. different? (P < 0.05)	No					Are means signif. different? (P < 0.05)	No					Are means signif. different? (P < 0.05)	No
One- or two-tailed P value?	Two-tailed					One- or two-tailed P value?	Two-tailed					One- or two-tailed P value?	Two-tailed
t, df	t=1.661 df=10					t, df	t=0.2679 df=8					t, df	t=1.073 df=11
How big is the difference?						How big is the difference?						How big is the difference?
Mean ± SEM of column A	1.163 ± 0.07113 N=6					Mean ± SEM of column A	1.914 ± 0.7429 N=5					Mean ± SEM of column A	0.2966 ± 0.01771 N=7
Mean ± SEM of column B	1.003 ± 0.06478 N=6					Mean ± SEM of column B	2.130 ± 0.3119 N=5					Mean ± SEM of column B	0.2635 ± 0.02626 N=6
Difference between means	0.1598 ± 0.09620					Difference between means	-0.2159 ± 0.8058					Difference between means	0.03314 ± 0.03087
95% confidence interval	-0.05450 to 0.3742					95% confidence interval	-2.074 to 1.642					95% confidence interval	-0.03481 to 0.1011
R square	0.2163					R square	0.008892					R square	0.0948
F test to compare variances						F test to compare variances						F test to compare variances
F,DFn, Dfd	1.206, 5, 5					F,DFn, Dfd	5.674, 4, 4					F,DFn, Dfd	1.885, 5, 6
P value	0.8424					P value	0.1213					P value	0.4625
P value summary	ns					P value summary	ns					P value summary	ns
Are variances significantly different?	No					Are variances significantly different?	No					Are variances significantly different?	No
Table Analyzed	*Hepatic TG levels					Table Analyzed	BAT TG levels					Table Analyzed	muscle TG levels
Column A	NCD-veh					Column A	NCD-veh					Column A	NCD-veh
vs	vs					vs	vs					vs	vs
Column C	HFD-veh					Column C	HFD-veh					Column C	HFD-veh
Unpaired t test						Unpaired t test						Unpaired t test
P value	< 0.0001					P value	0.0007					P value	< 0.0001
P value summary	****					P value summary	***					P value summary	****
Are means signif. different? (P < 0.05)	Yes					Are means signif. different? (P < 0.05)	Yes					Are means signif. different? (P < 0.05)	Yes
One- or two-tailed P value?	Two-tailed					One- or two-tailed P value?	Two-tailed					One- or two-tailed P value?	Two-tailed
t, df	t=7.537 df=10					t, df	t=5.394 df=8					t, df	t=8.018 df=11
How big is the difference?						How big is the difference?						How big is the difference?
Mean ± SEM of column A	1.163 ± 0.07113 N=6					Mean ± SEM of column A	1.914 ± 0.7429 N=5					Mean ± SEM of column A	0.2966 ± 0.01771 N=7
Mean ± SEM of column C	2.536 ± 0.1676 N=6					Mean ± SEM of column C	7.312 ± 0.6704 N=5					Mean ± SEM of column C	4.053 ± 0.5095 N=6
Difference between means	-1.373 ± 0.1821					Difference between means	-5.398 ± 1.001					Difference between means	-3.757 ± 0.4685
95% confidence interval	-1.778 to -0.9669					95% confidence interval	-7.705 to -3.090					95% confidence interval	-4.788 to -2.725
R square	0.8503					R square	0.7843					R square	0.8539
F test to compare variances						F test to compare variances						F test to compare variances
F,DFn, Dfd	5.556, 5, 5					F,DFn, Dfd	1.228, 4, 4					F,DFn, Dfd	709.3, 5, 6
P value	0.0831					P value	0.8469					P value	< 0.0001
P value summary	ns					P value summary	ns					P value summary	****
Are variances significantly different?	No					Are variances significantly different?	No					Are variances significantly different?	Yes
Table Analyzed	*Hepatic TG levels					Table Analyzed	BAT TG levels					Table Analyzed	muscle TG levels
Column C	HFD-veh					Column C	HFD-veh					Column C	HFD-veh
vs	vs					vs	vs					vs	vs
Column D	HFD-ncls					Column D	HFD-ncls					Column D	HFD-ncls
Unpaired t test						Unpaired t test						Unpaired t test
P value	0.0005					P value	0.0199					P value	0.0003
P value summary	***					P value summary	*					P value summary	***
Are means signif. different? (P < 0.05)	Yes					Are means signif. different? (P < 0.05)	Yes					Are means signif. different? (P < 0.05)	Yes
One- or two-tailed P value?	Two-tailed					One- or two-tailed P value?	Two-tailed					One- or two-tailed P value?	Two-tailed
t, df	t=5.114 df=10					t, df	t=2.900 df=8					t, df	t=5.804 df=9
How big is the difference?						How big is the difference?						How big is the difference?
Mean ± SEM of column C	2.536 ± 0.1676 N=6					Mean ± SEM of column C	7.312 ± 0.6704 N=5					Mean ± SEM of column C	4.053 ± 0.5095 N=6
Mean ± SEM of column D	1.644 ± 0.04756 N=6					Mean ± SEM of column D	4.963 ± 0.4546 N=5					Mean ± SEM of column D	0.7666 ± 0.06428 N=5
Difference between means	0.8911 ± 0.1743					Difference between means	2.349 ± 0.8099					Difference between means	3.287 ± 0.5663
95% confidence interval	0.5029 to 1.279					95% confidence interval	0.4809 to 4.216					95% confidence interval	2.006 to 4.568
R square	0.7234					R square	0.5124					R square	0.7892
F test to compare variances						F test to compare variances						F test to compare variances
F,DFn, Dfd	12.43, 5, 5					F,DFn, Dfd	2.175, 4, 4					F,DFn, Dfd	75.41, 5, 4
P value	0.0152					P value	0.4702					P value	0.001
P value summary	*					P value summary	ns					P value summary	***
Are variances significantly different?	Yes					Are variances significantly different?	No					Are variances significantly different?	Yes

## Sheet: Fig2C
Cholesterol
	NCD-veh						NCD-ncls						HFD-veh							HFD-ncls
	221.6	218	227	179.5	186.5	209.6	232.4	218.8	223.4	190.9	191.5	223.7	245	259.4	237.6	315.3	268.4	264.8	197.3	225.2	237.8	163.9	232.4	221.8	223.7	198.1
	219.8	225.2	215.2	176.5	182.4	227.3	228.8	221.6	219.8	185.5	199.8	219.8	243.2	255.8	220.8	309.9	266.6	183.7	188.3	221.2	236	172.4	228.7	227	214.4	200.7
	NCD-veh	NCD-ncls	HFD-veh	HFD-ncls
Mean	207.383	213	246.864	214.521
SEM	5.79019	4.71127	10.6717	6.10032
Two-way ANOVA
	P value	P value summary	Significant?
NCD-veh vs HFD-veh	< 0.0001	****	Yes
HFD-veh vs HFD-ncls	< 0.0001	****	Yes

## Sheet: Fig2D
Leptin	NCD-veh			NCD-ncls				HFD-veh						HFD-ncls
	0.986603	1.00106	0.5386	0.654213	1.83925	1.16002	0.856537	20.3086	20.3519	17.3604	29.5865	20.771	18.5021	9.12292	9.77325	3.02429	14.7157	4.58508	22.563
	0.957699	1.08777	0.596406	0.610858	1.91151	1.10222	0.870989	20.034	20.7277	16.8112	30.4103	21.1901	19.427	8.93505	9.97557	3.15436	15.3227	4.58508	22.5197
								NCD-veh	NCD-ncls	HFD-veh	HFD-ncls
							Mean	0.861355	1.1257	21.2901	10.6897
T.TEST							SEM	0.0948887	0.176932	1.23942	1.97629
	P value	P value summary	Significant?
NCD-veh vs NCD-ncls	0.256276	ns	No
NCD-veh vs HFD-veh	3.951e-09	****	Yes
HFD-veh vs HFD-ncls	0.000159724	***	Yes

## Sheet: Fig2E
INSULIN LEVELS	NCD vehicle			NCD narciclasine			HFD vehicle					HFD narciclasine
	0.448427	0.400449	0.328379	0.335441	0.310671	0.356625	0.679106	0.740306	1.26757	0.695583	1.37114	0.45078	0.516689	0.563766	0.363687	0.672044	0.358979
	0.45078	0.410604	0.326025	0.335441	0.274257	0.356625	0.672044	0.733245	1.34054	0.636736	1.49119	0.460196	0.544935	0.568474	0.394287	0.695583	0.380164
					NCD-veh	NCD-ncls	HFD-veh	HFD-ncls
				Mean	0.3941	0.3282	0.9627	0.4975
				SEM	0.001693	0.006069	0.012	0.009808
T.TEST
	P value	P value summary	Significant?
NCD-veh vs NCD-ncls	0.009	**	Yes
NCD-veh vs HFD-veh	0.0005	***	Yes
HFD-veh vs HFD-ncls	0.0011	**	Yes

## Sheet: Fig2F
GLUCOSE levels	NCD vehicle	NCD-ncls	HFD vehicle	HFD-ncls
	7	6.9	9.1	7.4
	5.7	7.9	7.3	6.9
	5	6.1	7.9	7.8
	6.9	6.8	10.6	7.8
	7.9	6.1	9.7	6.8
	6.8	6.7	7.5	6.8
	NCD-veh	NCD-ncls	HFD-veh	HFD-ncls
Mean	6.55	6.76	8.683	7.25
SEM	0.4217	0.3311	0.5419	0.1962
T.TEST
	P value	P value summary	Significant?
NCD-veh vs NCD-ncls	0.7133	ns	No
NCD-veh vs HFD-veh	0.0111	*	Yes
HFD-veh vs HFD-ncls	0.0321	*	Yes

[truncated: 67 more sheets: Fig2G, Fig2H, Fig2I, Fig3B, Fig3D, Fig3E, Fig3F, Fig3H, Fig4D, Fig4E, Fig5A, Fig5C, Fig5D, Fig5E, Fig5F, Fig5G, Fig5H, Fig5I, Fig5K, Fig6A …]
